# Supplementary material for: Age-Specific Profiles of Antibody Responses against Respiratory Syncytial Virus Infection
Source: PubMed Central journal article supplement — eBioMedicine. 2017 Jan 16;16:124–35. doi: 10.1016/j.ebiom.2017.01.014 (PMC5474434; doi:10.1016/j.ebiom.2017.01.014), 2017-01-16
Supplement: mmc1.pdf [file mmc1.pdf]

| Acronym | Definition                               |
|---------|------------------------------------------|
| HBV     | Hepatitis B virus                        |
| HCV     | Hepatitis C virus                        |
| HIV     | Human Immunodeficiency virus             |
| MEM     | Minimum Essential Medium                 |
| HEK293F | Human embryonic kidney 293 F             |
| TBS     | Tris-Buffered saline                     |
| PBS     | Phosphate-Buffered saline                |
| HRP     | Horseradish peroxidase                   |
| BSA     | Bovine serum albumin                     |
| GMR     | Geometric mean ratio                     |
| GMT     | Geometric mean titer                     |
| PLNT    | Palivizumab-like neutralization antibody |
