# Supplementary material for: Age-Specific Profiles of Antibody Responses against Respiratory Syncytial Virus Infection
Source: PubMed Central journal article supplement — eBioMedicine. 2017 Jan 16;16:124–35. doi: 10.1016/j.ebiom.2017.01.014 (PMC5474434; doi:10.1016/j.ebiom.2017.01.014), 2017-01-16
Supplement: mmc2.pdf [file mmc2.pdf]

| Age Group | RSV Group A          |                     |                     |                     | RSV Group B         |                     |                     |                     |
|-----------|----------------------|---------------------|---------------------|---------------------|---------------------|---------------------|---------------------|---------------------|
|           | Anti-G(A) IgG        |                     | Anti-G(B) IgG       |                     | Anti-G(A) IgG       |                     | Anti-G(B) IgG       |                     |
|           | Acute                | Convalescent        | Acute               | Convalescent        | Acute               | Convalescent        | Acute               | Convalescent        |
| 0-3 mo    | 1.46<br>(0.77-2.78)  | 2.10<br>(1.34-3.28) | 1.14<br>(0.69-1.90) | 1.04<br>(0.64-1.69) | 1.72<br>(1.10-2.67) | 1.38<br>(0.97-1.97) | 1.60<br>(0.80-3.20) | 2.99<br>(1.66-5.39) |
| 4-6 mo    | 0.33<br>(0.19-0.55)  | 2.38<br>(1.37-4.15) | 0.38<br>(0.22-0.66) | 0.80<br>(0.56-1.13) | 0.28<br>(0.10-0.76) | 0.56<br>(0.29-1.09) | 0.24<br>(0.11-0.51) | 11.8<br>(5.25-26.6) |
| 7-12 mo   | 0.10<br>(0.06-0.16)  | 6.42<br>(3.16-13.0) | 0.12<br>(0.08-0.19) | 1.20<br>(0.51-2.79) | 0.09<br>(0.05-0.16) | 0.34<br>(0.16-0.70) | 0.07<br>(0.05-0.09) | 19.7<br>(10.4-37.3) |
| 13-18 mo  | 0.08<br>(0.06-0.12)  | 9.07<br>(5.63-14.6) | 0.10<br>(0.07-0.16) | 1.76<br>(0.87-3.55) | 0.04<br>(0.02-0.11) | 0.20<br>(0.06-0.73) | 0.05<br>(0.02-0.10) | 11.2<br>(2.99-42.0) |
| 19-36 mo  | 0.258<br>(0.12-0.58) | 19.0<br>(9.16-39.6) | 0.40<br>(0.20-0.80) | 10.4<br>(4.75-22.9) | 0.20<br>(0.04-1.08) | 1.90<br>(0.17-21.7) | 0.13<br>(0.05-0.36) | 32.4<br>(18.3-57.3) |

**Supplemental Table II. Serum IgG concentrations against G of group A and group B in acute phase and convalescent phase**

The sera were subjected to ELISA coating RSV G protein of group A or group B. Serum IgG concentrations against G of group A and group B in acute phase and convalescent phase were measured. Data were analyzed in different age groups and in different RSV groups infected during the research period. The sample size in acute phase: 0–3 mo: n = 18 (group A), n = 11 (group B); 4–6 mo: n = 16 (group A), n = 10 (group B); 7–12 mo: n = 16 (group A), n = 10 (group B); 13–18 mo: n = 25 (group A), n = 6 (group B); 19–36 mo: n = 21 (group A), n = 8 (group B). The sample size in convalescent phase: 0–3 mo: n = 18 (group A), n = 11 (group B); 4–6 mo: n = 16 (group A), n = 11 (group B); 7–12 mo: n = 17 (group A), n = 12 (group B); 13–18 mo: n = 25 (group A), n = 6 (group B); 19–36 mo: n = 19 (group A), n = 8 (group B). The data represented the geometric means with corresponding 95%CI.
